# Supplementary material
Source: PubMed Central journal article supplement (PMC4364524)
Supplement: NIHMS649181-supplement-1.pdf [file NIHMS649181-supplement-1.pdf]

**A**

| Gene    | CGI    | % Change in Methylation | FDR      |
|---------|--------|-------------------------|----------|
| PRIM2   | CGI    | -0.37                   | 9.54E-07 |
| MEOX1   | CGI    | -0.34                   | 4.22E-08 |
| PPBP    | CGI    | -0.28                   | 9.47E-05 |
| PTPN7   | CGI    | -0.27                   | 3.94E-07 |
| PRF1    | CGI    | -0.15                   | 1.63E-04 |
| MYO10   | CGI    | -0.14                   | 3.92E-05 |
| NOD2    | CGI    | -0.13                   | 3.25E-02 |
| OASL    | CGI    | -0.11                   | 3.49E-03 |
| PSTPIP1 | CGI    | -0.11                   | 1.11E-05 |
| DCHS1   | CGI    | 0.11                    | 1.59E-03 |
| TRIP6   | CGI    | 0.16                    | 6.31E-03 |
| ABCA1   | CGI    | 0.18                    | 2.36E-02 |
| SLFN13  | CGI    | 0.20                    | 1.52E-02 |
| TP63    | CGI    | 0.22                    | 5.04E-03 |
| LCK     | CGI    | 0.44                    | 3.48E-05 |
| AIM2    | NO CGI | -0.76                   | 5.21E-07 |
| FCER1A  | NO CGI | -0.55                   | 5.59E-10 |
| CCL5    | NO CGI | -0.53                   | 1.07E-05 |
| ICOS    | NO CGI | -0.43                   | 4.79E-08 |
| ISG20   | NO CGI | -0.27                   | 4.72E-08 |
| CCL3    | NO CGI | -0.27                   | 3.00E-05 |
| IL32    | NO CGI | -0.25                   | 1.31E-02 |
| SRGN    | NO CGI | -0.25                   | 1.06E-05 |
| TRIM69  | NO CGI | -0.23                   | 6.49E-02 |
| S100A8  | NO CGI | -0.22                   | 2.19E-05 |
| EMP1    | NO CGI | -0.21                   | 8.21E-04 |
| ITGB2   | NO CGI | -0.21                   | 1.42E-05 |
| RORC    | NO CGI | -0.18                   | 1.90E-05 |
| IL22    | NO CGI | -0.17                   | 3.39E-05 |
| IKBKE   | NO CGI | -0.16                   | 2.51E-06 |
| IL16    | NO CGI | -0.15                   | 2.31E-10 |
| CCL20   | NO CGI | -0.14                   | 1.55E-04 |
| ITGB7   | NO CGI | -0.13                   | 1.19E-02 |
| ITGAX   | NO CGI | -0.13                   | 1.08E-07 |
| ACPP    | NO CGI | -0.12                   | 1.58E-02 |
| SH2D2A  | NO CGI | -0.12                   | 1.64E-03 |
| CCL22   | NO CGI | -0.11                   | 3.76E-04 |
| TLR3    | NO CGI | 0.11                    | 6.47E-04 |
| TNFSF15 | NO CGI | 0.12                    | 3.72E-02 |
| IFITM3  | NO CGI | 0.18                    | 1.35E-03 |

**B**

| Molecules in Network                                                                                                                                                                                                                                                                                                                                                              | Focus Molecules | Top Functions                                                                    |
|-----------------------------------------------------------------------------------------------------------------------------------------------------------------------------------------------------------------------------------------------------------------------------------------------------------------------------------------------------------------------------------|-----------------|----------------------------------------------------------------------------------|
| <b>AIM2, CCL3, CCL5, CCL20, CCL22</b> , CD3, <b>EMP1</b> , Fc $\epsilon$ r1, <b>FCER1A, ICOS</b> , IFN Beta, IgG, <b>IKBKE, IL16, IL22</b> , IL12 (complex), Interferon alpha, <b>ISG20, ITGAX, ITGB2</b> , Jnk, <b>LCK</b> , NF $\kappa$ B (complex), <b>NOD2</b> , Nr1h, <b>OASL</b> , P38 MAPK, PI3K (complex), <b>RORC, SH2D2A</b> , TCR, <b>TLR3, TNFSF15, TRIM69, TRIP6</b> | 23              | Inflammatory Response, Cell-To-Cell Signaling and Interaction, Cellular Movement |
| <b>ABCA1, ACPP</b> , ANXA9, APOC2, COL7A1, <b>DCHS1</b> , DGKI, E2F1, estrogen receptor, <b>IFITM3, IL32</b> , IL1B, KRT34, LILRA5, MAPK1, Mapk, <b>MEOX1</b> , MYLK (includes EG:107589), PLA2G3, PLA2G5, POPDC2, <b>PPBP</b> , PPT2 (includes EG:100126133), <b>PRF1, PRIM2, PTPN7</b> , RNASE2, <b>S100A8</b> , SEPP1, SMARCA4, <b>SRGN</b> , TDRD7, TNF, <b>TP63</b> , ZNF318 | 13              | Embryonic Development, Hair and Skin Development and Function, Organ Development |

**Figure S1.** 40 genes exhibit differential average methylation between naïve and memory CD4 T cells. **(A)** Change in methylation and FDR values for the 40 differentially methylated genes. **(B)** Top networks (> 10 focus molecules) identified by IPA for 40 genes with differential average methylation between naïve and memory CD4 T cells. Bold genes have differential methylation. Data is representative of  $\geq 3$  donors.

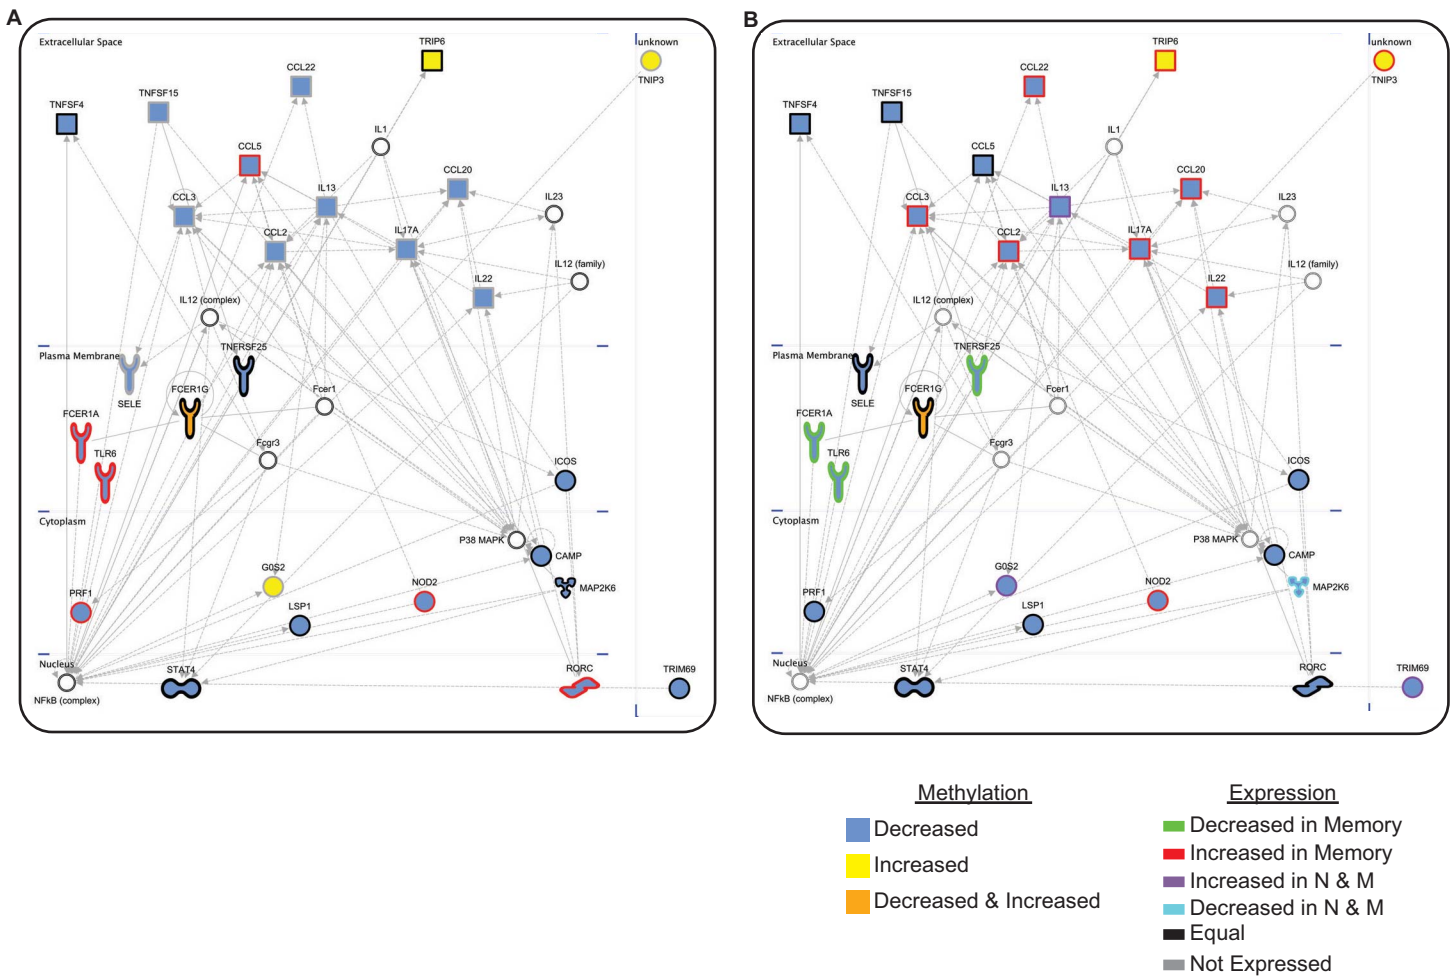

**Figure S2.** Activation-induced changes in memory CD4 T cells in genes linked to cell-to-cell signaling and cellular movement. Methylation (fill) and gene expression (outline) states for memory CD4 T cells at rest (**A**) and following 48 h of activation (**B**). Unfilled molecules were not targeted in the primer library and thus have no methylation information. Gene expression data for these molecules was not included. Data is representative of  $\geq 3$  donors.

Supplemental Table I

| Gene       | Forward Primer                                          | Reverse Primer                                    | CpGs Covered |
|------------|---------------------------------------------------------|---------------------------------------------------|--------------|
| AIM2       | GTCTTACTAACTTTTATATTCTCAGAATGCTAGCTCATATTAGATGTTTCAGTGC | CTGGAGCTCTAATTAAGCTTGCTGGTTTGGGTTCTC              | 12           |
| CCL3       | GTGGGCTGACCAAGAAGGTAATAAAGTCTAACTAGTAAATGAGAAAAATTCAG   | CCTTCTGAAGTCTGAAACAAGCTTCTCCTCTTTATAGGCAGCCC      | 6            |
| CD4        | CAAGACAGGTTCTCACTAGTCACTCAGGCTAGAGTGC                   | CCA CAC CCT AAG CTT GGG CCG GC                    | 16           |
| CD4 Intron | CAC AGA TAC GCC TGC AGG AGA AGC AGC G                   | CCT CAT GAG ACC GCT AGC ACC AAT TCT TTT CGA ATC C | 10           |
| IL17A      | GTCAGCCCTCTGAGTTACTAGTAGAGCAGGACAGGG                    | GGGATGGATGAGTTTAAGCTTGCTATGAGATGGACAAAATG         | 13           |
| TOX        | CTCCAGGCTTTTCGTGGACTAGTCAAGAGCCCTATAGGG                 | CGC GGC AAG CTT CCG TCG GC                        | 98           |

Table S1. Primers for luciferase reporter assay cloning.

| GENE  | CGI    | Total CpG | CpG with Increased Methylation at 48 h | CpG with Decreased Methylation at 48 h |
|-------|--------|-----------|----------------------------------------|----------------------------------------|
| CCL2  | No CGI | 12        | 0                                      | 4                                      |
| CCL20 | No CGI | 3         | 0                                      | 0                                      |
| CCL22 | No CGI | 10        | 0                                      | 1                                      |
| CCL3  | No CGI | 7         | 0                                      | 4                                      |
| CCL4  | No CGI | 2         | 0                                      | 0                                      |
| CCL5  | No CGI | 6         | 0                                      | 0                                      |
| IL10  | No CGI | 6         | 0                                      | 0                                      |
| IL13  | No CGI | 18        | 0                                      | 0                                      |
| IL16  | No CGI | 25        | 1                                      | 1                                      |
| IL17A | No CGI | 3         | 0                                      | 1                                      |
| IL17F | No CGI | 16        | 0                                      | 0                                      |
| IL1A  | No CGI | 2         | 0                                      | 0                                      |
| IL22  | No CGI | 8         | 0                                      | 0                                      |
| IL23A | No CGI | 9         | 0                                      | 0                                      |
| IL24  | No CGI | 13        | 0                                      | 0                                      |
| IL32  | No CGI | 23        | 4                                      | 4                                      |
| IL8   | No CGI | 2         | 0                                      | 1                                      |
| Total |        | 165       | 5                                      | 16                                     |

**Table SII.** Methylation of cytokine promoters in naïve CD4 T cells covered at a minimum read depth of 25 reads. This data is representative of two donors.
